# Supplementary material
Source: HighWire-hosted journal article supplement (https://tsaco.smart01.highwire.org/content/2/1/e000128)
Supplement: inline-supplementary-material-3 [file inline-supplementary-material-3.docx]

Table 2 – Pre Injury ASA Score and Rate of Readmission

| **Pre-Injury ASA Score** | **Rate of Readmission** | | |
| --- | --- | --- | --- |
| Total | 30 Day Readmission (6.5%) | 3 Month Readmission (9.6%) | 6 Month Readmission (11.8%) |
| 1 | 3.1% | 5.2% | 6.7% |
| 2 | 6.7% | 9.5% | 11.9% |
| 3 | 8.1% | 12.2% | 15.2% |
| 4 | 15.3% | 19.1% | 20.1% |
| 5 | - | - | - |
