# Supplementary material
Source: HighWire-hosted journal article supplement (https://tsaco.smart01.highwire.org/content/2/1/e000128)
Supplement: inline-supplementary-material-6 [file inline-supplementary-material-6.docx]

Table 5 – Comparison of Pre-Injury ASA Score vs. Charlson Comorbidity Index

| **Assessment of Comorbidity** | **Area Under the Curve** | | |
| --- | --- | --- | --- |
| **30 Day Readmission**  **n = 307** | **3 Month Readmission**  **n = 453** | **6 Month Readmission**  **n = 556** |
| Pre-Injury ASA Score | 0.6504 (0.6211, 0.6797) | 0.6308 (0.6058, 0.6558) | 0.6191 (0.5962, 0.6420) |
| Charlson Comorbidity Index | 0.5580 (0.5273, 0.5886) | 0.5960 (0.5701, 0.6220) | 0.6141 (0.5903, 0.6378) |
|  |  |  |  |
| Difference in AUC (P-ASA vs. CCI) | 0.0924 (0.0594, 0.1254) | 0.0347 (0.0048, 0.0065) | 0.0050 (-0.0230, 0.0331) |
| Significance | P < 0.0001 | P = 0.0231 | P = 0.7266 |
